# Supplementary material for: An explicit account of solvation is essential for modeling Suzuki–Miyaura coupling in protic solvents
Source: Royal Society of Chemistry journal article supplement (doi:10.1039/c5dt03126e), 2015-01-01
Supplement: c5dt03126e1.pdf [file c5dt03126e1.pdf]

# **Explicit account of solvation may be crucial for modeling Suzuki-Miyaura coupling in protic solvents.**

Alexey A. Zeifman\*‡, Fedor N. Novikov‡, Victor S. Stroylov‡, Oleg V. Stroganov‡,  
Igor V. Svitanko‡, Ghermes G. Chilov‡

‡N. D. Zelinsky Institute Of Organic Chemistry (ZIOC RAS). Leninsky prospekt. 47. 119991 Moscow. Russian Federation

## **Supporting information**

## Simulation details

### FEP

Energy minimization was performed with *steep* integrator to the energy tolerance of 100 kJ\*mol<sup>-1</sup>\*nm<sup>-1</sup>. Molecular dynamics was run with *sd* (Langevin dynamics) integrator with 2 fs timestep. Electrostatic interactions were treated by 6<sup>th</sup> order particle mesh Ewald (PME) with the cut-off radius 1.0 nm. Pressure was controlled by Parrinello-Rahman barostat.

Transition free energies were calculated by Bennett acceptance ratio<sup>1</sup>. First, coulomb interactions of the solute with solvent were turned off, and then VdW component was decoupled (in order to avoid singularities).

An error estimate taking into account temporal correlations was made by splitting the data into blocks and determining the free energy differences over those blocks and assuming the blocks are independent. The final error estimate was determined from the average variance over 5 blocks.

### Supporting tables 1-5. Phase space overlap measures

Phase space overlap at each  $\lambda$  window was estimated from relative entropies  $s_A$  and  $s_B$  by calculating parameter  $\Pi$  according to formula

$$\Pi_{A \rightarrow B} = \frac{\sqrt{s_A} W_L \left[ \frac{1}{2\pi} (M-1)^2 \right] - \sqrt{2s_A}}{\sqrt{s_B}}$$

$$\Pi_{B \rightarrow A} = \frac{\sqrt{s_B} W_L \left[ \frac{1}{2\pi} (M-1)^2 \right] - \sqrt{2s_B}}{\sqrt{s_A}}$$

, where  $s_A$  and  $s_B$  are an information theory entropy which reflects the “distance” between the distributions of phase space A and B.  $W_L(x)$  is the Lambert W function. M is the number of work trials used in the free energy calculation.  $s_A$  and  $s_B$  are calculated as

$$s_A = \langle W \rangle_A - \Delta G$$

$$s_B = -\langle W \rangle_B + \Delta G$$

and represent the dissipated work.  $s_A$  and  $s_B$  are non-negative and equal to zero for identical distributions.

Maximum of  $\Pi_{A \rightarrow B}$  and  $\Pi_{B \rightarrow A}$  was selected<sup>4</sup>.

Transitions with  $\Pi$  values < 0.5 (indicating poor phase space overlap) are denoted with asterisk \* and were divided into two steps and re-calculated (see Table 8 below).

### Supporting Table 1. $\Pi$ values for benzene

| $\lambda$ | Pd(PPh <sub>3</sub> ) <sub>2</sub> Ph <sub>2</sub> |      | Transition state |      | Pd(PPh <sub>3</sub> ) <sub>2</sub> |      | Ph <sub>2</sub> |      |
|-----------|----------------------------------------------------|------|------------------|------|------------------------------------|------|-----------------|------|
|           | Coulomb                                            | VdW  | Coulomb          | VdW  | Coulomb                            | VdW  | Coulomb         | VdW  |
| 0-0.1     | 4.48                                               | 3.98 | 4.48             | 4    | 4.42                               | 4.1  | 4.48            | 5.62 |
| 0.1-0.2   | 4.42                                               | 3.39 | 4.42             | 3.41 | 4.42                               | 3.45 | 4.42            | 4.47 |
| 0.2-0.3   | 4.42                                               | 3.54 | 6.33             | 3.54 | 4.42                               | 3.55 | 4.48            | 4.45 |
| 0.3-0.4   | 4.48                                               | 3.53 | 6.33             | 3.56 | 4.38                               | 3.52 | 4.48            | 4.49 |
| 0.4-0.5   | 4.34                                               | 3.43 | 4.42             | 3.46 | 4.42                               | 3.4  | 4.42            | 4.39 |

|         |      |       |      |      |      |      |      |      |
|---------|------|-------|------|------|------|------|------|------|
| 0.5-0.6 | 4.38 | 3.27  | 4.48 | 3.25 | 4.38 | 3.19 | 4.42 | 4.33 |
| 0.6-0.7 | 4.38 | 2.92  | 4.48 | 2.95 | 4.42 | 2.87 | 4.42 | 4.16 |
| 0.7-0.8 | 4.38 | 2.12  | 4.42 | 2.2  | 4.38 | 2.09 | 4.48 | 3.74 |
| 0.8-0.9 | 4.42 | 0.21* | 4.42 | 0.2* | 4.38 | 1.01 | 4.42 | 2.81 |
| 0.9-1   | 4.38 | 2.16  | 4.42 | 2.24 | 4.34 | 2.16 | 4.48 | 3.53 |

\*Simulation was repeated with more  $\lambda$  steps, see Table 10

**Supporting Table 2.  $\Pi$  values for DMF**

| $\lambda$ | Pd(PPh <sub>3</sub> ) <sub>2</sub> Ph <sub>2</sub> |        | Transition state |        | Pd(PPh <sub>3</sub> ) <sub>2</sub> |      | Ph <sub>2</sub> |      |
|-----------|----------------------------------------------------|--------|------------------|--------|------------------------------------|------|-----------------|------|
|           | Coulomb                                            | VdW    | Coulomb          | VdW    | Coulomb                            | VdW  | Coulomb         | VdW  |
| 0-0.1     | 4.27                                               | 3.48   | 4.3              | 3.48   | 4.3                                | 3.58 | 4.38            | 5.38 |
| 0.1-0.2   | 4.22                                               | 3.1    | 4.34             | 3.12   | 4.27                               | 3.14 | 4.38            | 4.28 |
| 0.2-0.3   | 4.15                                               | 3.24   | 4.34             | 3.26   | 4.27                               | 3.22 | 4.34            | 4.27 |
| 0.3-0.4   | 4.38                                               | 3.18   | 4.34             | 3.2    | 4.34                               | 3.13 | 4.34            | 4.23 |
| 0.4-0.5   | 4.17                                               | 2.99   | 4.3              | 3.04   | 4.25                               | 2.95 | 4.38            | 4.15 |
| 0.5-0.6   | 4.27                                               | 2.69   | 4.38             | 2.72   | 4.27                               | 2.61 | 4.34            | 3.99 |
| 0.6-0.7   | 4.27                                               | 2.16   | 4.3              | 2.15   | 4.3                                | 2.06 | 4.34            | 3.66 |
| 0.7-0.8   | 4.2                                                | 0.9    | 4.3              | 1.02   | 4.62                               | 1.19 | 4.34            | 3.04 |
| 0.8-0.9   | 4.25                                               | -0.09* | 4.34             | -0.18* | 4.48                               | 0.65 | 4.34            | 2.7  |
| 0.9-1     | 4.22                                               | 2.27   | 4.3              | 2.3    | 4.15                               | 2.26 | 4.34            | 3.56 |

\*Simulation was repeated with more  $\lambda$  steps, see Table 10

**Supporting Table 3.  $\Pi$  values for ethanol**

| $\lambda$ | Pd(PPh <sub>3</sub> ) <sub>2</sub> Ph <sub>2</sub> |      | Transition state |      | Pd(PPh <sub>3</sub> ) <sub>2</sub> |      | Ph <sub>2</sub> |      |
|-----------|----------------------------------------------------|------|------------------|------|------------------------------------|------|-----------------|------|
|           | Coulomb                                            | VdW  | Coulomb          | VdW  | Coulomb                            | VdW  | Coulomb         | VdW  |
| 0-0.1     | 4.25                                               | 4.12 | 4.34             | 4.17 | 3.99                               | 4.26 | 4.34            | 5.73 |
| 0.1-0.2   | 4.54                                               | 3.55 | 4.38             | 3.57 | 3.97                               | 3.58 | 4.38            | 4.52 |
| 0.2-0.3   | 4.2                                                | 3.66 | 4.38             | 3.67 | 4.15                               | 3.67 | 4.38            | 4.57 |
| 0.3-0.4   | 5.41                                               | 3.62 | 4.38             | 3.68 | 4.37                               | 3.62 | 4.42            | 4.48 |
| 0.4-0.5   | 4.62                                               | 3.55 | 4.38             | 3.57 | 4.46                               | 3.5  | 4.42            | 4.49 |
| 0.5-0.6   | 4.34                                               | 3.36 | 4.38             | 3.4  | 4.34                               | 3.32 | 4.42            | 4.4  |
| 0.6-0.7   | 4.3                                                | 3.1  | 4.42             | 3.05 | 4.27                               | 2.98 | 4.42            | 4.26 |
| 0.7-0.8   | 4.34                                               | 2.35 | 5.41             | 2.41 | 4.34                               | 2.41 | 4.42            | 3.79 |
| 0.8-0.9   | 4.34                                               | 0.82 | 4.38             | 0.9  | 4.3                                | 1.4  | 4.42            | 3    |
| 0.9-1     | 4.27                                               | 2.63 | 4.38             | 2.66 | 4.34                               | 2.62 | 4.42            | 3.82 |

**Supporting Table 4.  $\Pi$  values for toluene**

| $\lambda$ | Pd(PPh <sub>3</sub> ) <sub>2</sub> Ph <sub>2</sub> |       | Transition state |       | Pd(PPh <sub>3</sub> ) <sub>2</sub> |      | Ph <sub>2</sub> |      |
|-----------|----------------------------------------------------|-------|------------------|-------|------------------------------------|------|-----------------|------|
|           | Coulomb                                            | VdW   | Coulomb          | VdW   | Coulomb                            | VdW  | Coulomb         | VdW  |
| 0-0.1     | 4.34                                               | 3.89  | 4.48             | 3.94  | 4.42                               | 4.04 | 4.42            | 4.11 |
| 0.1-0.2   | 4.42                                               | 3.39  | 4.42             | 3.36  | 4.42                               | 3.37 | 4.48            | 4.46 |
| 0.2-0.3   | 4.48                                               | 3.49  | 4.42             | 3.51  | 4.42                               | 3.49 | 4.42            | 4.41 |
| 0.3-0.4   | 4.42                                               | 3.47  | 4.48             | 3.51  | 4.42                               | 3.47 | 4.42            | 4.39 |
| 0.4-0.5   | 4.38                                               | 3.34  | 4.42             | 3.4   | 4.38                               | 3.31 | 4.42            | 4.28 |
| 0.5-0.6   | 4.42                                               | 3.19  | 4.42             | 3.21  | 4.42                               | 3.12 | 4.42            | 4.09 |
| 0.6-0.7   | 5.41                                               | 2.78  | 4.48             | 2.82  | 4.42                               | 2.75 | 4.42            | 3.63 |
| 0.7-0.8   | 4.34                                               | 1.97  | 4.42             | 2.11  | 4.42                               | 1.99 | 4.42            | 2.88 |
| 0.8-0.9   | 4.38                                               | 0.27* | 4.42             | 0.26* | 4.38                               | 1.08 | 4.42            | 3.45 |
| 0.9-1     | 4.38                                               | 2.16  | 4.48             | 2.2   | 4.38                               | 2.06 | 5.41            | 3.22 |

\*Simulation was repeated with more  $\lambda$  steps, see Table 10

**Supporting Table 5.  $\Pi$  values for water**

| $\lambda$ | Pd(PPh <sub>3</sub> ) <sub>2</sub> Ph <sub>2</sub> |      | Transition state |      | Pd(PPh <sub>3</sub> ) <sub>2</sub> |      | Ph <sub>2</sub> |      |
|-----------|----------------------------------------------------|------|------------------|------|------------------------------------|------|-----------------|------|
|           | Coulomb                                            | VdW  | Coulomb          | VdW  | Coulomb                            | VdW  | Coulomb         | VdW  |
| 0-0.1     | 4.23                                               | 3.83 | 4.13             | 3.83 | 4.15                               | 3.85 | 4.38            | 4.61 |
| 0.1-0.2   | 4.11                                               | 3.73 | 4.22             | 3.76 | 3.99                               | 3.74 | 4.17            | 4.58 |
| 0.2-0.3   | 4.09                                               | 3.6  | 4.2              | 3.59 | 4.07                               | 3.56 | 4.2             | 4.49 |
| 0.3-0.4   | 4.04                                               | 3.41 | 4.22             | 3.43 | 4.37                               | 3.39 | 4.22            | 4.31 |
| 0.4-0.5   | 4.3                                                | 3.24 | 4.54             | 3.27 | 3.91                               | 3.17 | 4.25            | 4.24 |

|         |      |        |      |        |      |      |      |      |
|---------|------|--------|------|--------|------|------|------|------|
| 0.5-0.6 | 4.25 | 2.92   | 4.22 | 2.92   | 4.03 | 2.79 | 4.25 | 4.1  |
| 0.6-0.7 | 4.07 | 1.91   | 4.25 | 1.96   | 4.07 | 1.74 | 4.27 | 3.53 |
| 0.7-0.8 | 4.17 | -0.32* | 4.25 | -0.35* | 4.09 | 0.55 | 4.3  | 2.41 |
| 0.8-0.9 | 4.2  | 1.98   | 4.27 | 1.97   | 4.21 | 2.03 | 4.3  | 3.86 |
| 0.9-1   | 4.17 | 3.45   | 4.27 | 3.46   | 4.21 | 3.5  | 4.3  | 4.27 |

\*Simulation was repeated with more  $\lambda$  steps, see Table 10

**Supporting table 6. Solvation free energy of reaction components calculated by MM FEP. kJ/mol**

|         | Pd(PPh <sub>3</sub> ) <sub>2</sub> Ph <sub>2</sub> |                |        | TS     |       |        | Pd(PPh <sub>3</sub> ) <sub>2</sub> |       |        | PhPh  |       |       |
|---------|----------------------------------------------------|----------------|--------|--------|-------|--------|------------------------------------|-------|--------|-------|-------|-------|
|         | VdW                                                | Q <sup>1</sup> | Total  | VdW    | Q     | Total  | VdW                                | Q     | Total  | VdW   | Q     | Total |
| Benzene | -122.7                                             | -8.6           | -131.3 | -121.5 | -5.6  | -127.1 | -127.2                             | -9.3  | -136.5 | -35.5 | -3.7  | -39.2 |
| Toluene | -120.4                                             | -9.3           | -129.7 | -120.2 | -6.0  | -126.3 | -126.3                             | -10.1 | -136.4 | -36.3 | -4.1  | -40.3 |
| Ethanol | -102.8                                             | -13.8          | -116.6 | -102.5 | -8.3  | -110.7 | -104.9                             | -23.8 | -128.7 | -29.3 | -5.6  | -34.9 |
| DMF     | -102.6                                             | -22.6          | -125.2 | -102.7 | -14.7 | -117.4 | -110.3                             | -23.6 | -134.0 | -28.5 | -10.3 | -38.8 |
| Water   | 17.8                                               | -26.1          | -8.3   | 17.3   | -16.0 | 1.2    | 8.7                                | -50.1 | -41.4  | 6.6   | -13.9 | -7.3  |

<sup>1</sup> electrostatic interactions

**Supporting table 7. Solvation free energy of reaction components calculated by PCM-SMD. kJ/mol (total energy)**

|         | Pd(PPh <sub>3</sub> ) <sub>2</sub> Ph <sub>2</sub> | TS     | Pd(PPh <sub>3</sub> ) <sub>2</sub> | PhPh  |
|---------|----------------------------------------------------|--------|------------------------------------|-------|
| Benzene | -111.5                                             | -107.0 | -77.8                              | -37.8 |
| Toluene | -109.2                                             | -104.5 | -80.7                              | -37.3 |
| Ethanol | -98.3                                              | -86.1  | -54.0                              | -35.1 |
| DMF     | -192.7                                             | -180.7 | -136.0                             | -64.2 |
| Water   | -18.8                                              | -6.1   | 14.4                               | -11.4 |

<sup>1</sup> sum of cavitation, dispersion and repulsion components

<sup>2</sup> electrostatic interactions

**Supporting table 8. Results of re-run for  $\Pi$  values < 0.5.**

|                                                                             | $\Pi$ value         |                      | $\Delta G$ , kJ/mol |                      |
|-----------------------------------------------------------------------------|---------------------|----------------------|---------------------|----------------------|
|                                                                             | $\Delta\lambda=0.1$ | $\Delta\lambda=0.05$ | $\Delta\lambda=0.1$ | $\Delta\lambda=0.05$ |
| <b>Benzene</b>                                                              |                     |                      |                     |                      |
| Pd(PPh <sub>3</sub> ) <sub>2</sub> Ph <sub>2</sub> , VdW, $\lambda=0.8-0.9$ | 0.21                | 2.44                 | -13.00±0.33         | -12.77±0.18          |
| TS, VdW, $\lambda=0.8-0.9$                                                  | 0.2                 | 2.39                 | -12.87±0.11         | -12.66±0.09          |
| <b>DMF</b>                                                                  |                     |                      |                     |                      |
| Pd(PPh <sub>3</sub> ) <sub>2</sub> Ph <sub>2</sub> , VdW, $\lambda=0.8-0.9$ | -0.09               | 1.99                 | -24.87±0.37         | -24.58±0.30          |
| TS, VdW, $\lambda=0.8-0.9$                                                  | -0.18               | 2.03                 | -23.87±0.73         | -24.11±0.16          |
| <b>Toluene</b>                                                              |                     |                      |                     |                      |
| Pd(PPh <sub>3</sub> ) <sub>2</sub> Ph <sub>2</sub> , VdW, $\lambda=0.8-0.9$ | 0.27                | 2.39                 | -12.63±0.47         | -13.28±0.27          |
| TS, VdW, $\lambda=0.8-0.9$                                                  | 0.26                | 2.32                 | -12.44±0.42         | -12.72±0.31          |
| <b>Water</b>                                                                |                     |                      |                     |                      |
| Pd(PPh <sub>3</sub> ) <sub>2</sub> Ph <sub>2</sub> , VdW, $\lambda=0.7-0.8$ | -0.32               | 2.17                 | -33.80±0.59         | -33.55±0.04          |
| TS, VdW, $\lambda=0.7-0.8$                                                  | -0.35               | 2.15                 | -33.40±0.89         | -32.89±0.30          |

- (2) Marenich. A. V.; Cramer. C. J.; Truhlar. D. G. *The Journal of Physical Chemistry B* **2009**. 113. 6378.
- (3) Vreven. T.; Mennucci. B.; da Silva. C. O.; Morokuma. K.; Tomasi. J. *J. Chem. Phys.* **2001**. 115. 62.
- (4) Wu. D.; Kofke. D. A. *J Chem Phys* **2005**. 123. 054103.

## Supporting Figure 1.

Correlation between electrostatic + non-electrostatic PCM (g09) and FEP solvation free energies for reactant, products and transition state.

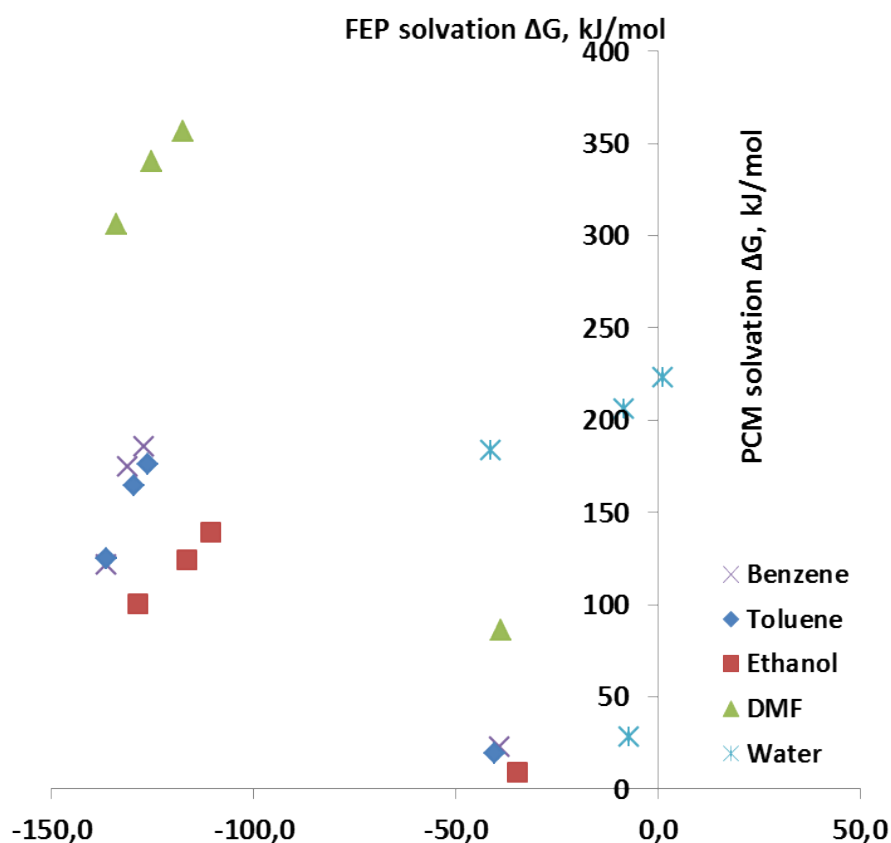

## XYZ coordinates of vacuum-optimized compounds

Pd(PPh3)2Ph2

91

```

Pd -0.077670  0.944093  0.069027
C  -1.452570  2.489654  0.245520
C   1.228360  2.580016 -0.007657
C  -1.973755  3.167138 -0.863894
C  -2.903267  4.197949 -0.716189
C  -3.332869  4.582442  0.552293
C  -2.819803  3.926097  1.667881
C  -1.890448  2.894917  1.513292
C   1.583959  3.086192 -1.266800

```

|   |           |           |           |
|---|-----------|-----------|-----------|
| C | 2.439831  | 4.179709  | -1.403415 |
| C | 2.964444  | 4.805732  | -0.274894 |
| C | 2.610106  | 4.331629  | 0.984743  |
| C | 1.749237  | 3.239012  | 1.112491  |
| H | 1.181224  | 2.631835  | -2.167575 |
| H | 2.691189  | 4.546234  | -2.395292 |
| H | 3.628871  | 5.658354  | -0.376162 |
| H | 2.995152  | 4.818869  | 1.876738  |
| H | 1.470031  | 2.923605  | 2.111643  |
| H | -1.643375 | 2.904726  | -1.864955 |
| H | -3.285817 | 4.707672  | -1.596618 |
| H | -4.051206 | 5.387978  | 0.669496  |
| H | -3.137677 | 4.219117  | 2.665163  |
| H | -1.500874 | 2.411527  | 2.405410  |
| P | 1.885599  | -0.445865 | 0.080177  |
| P | -1.897071 | -0.588263 | -0.101520 |
| C | -1.595111 | -1.958499 | -1.399573 |
| C | -3.570336 | 0.138738  | -0.686250 |
| C | -2.451917 | -1.494052 | 1.476339  |
| C | 2.800440  | -0.477662 | 1.752074  |
| C | 3.173125  | 0.176958  | -1.173440 |
| C | 1.876462  | -2.350083 | -0.221382 |
| C | -1.002629 | -1.575056 | -2.598758 |
| C | -0.764115 | -2.512391 | -3.591583 |
| C | -1.107452 | -3.841001 | -3.389990 |
| C | -1.689885 | -4.226747 | -2.193068 |
| C | -1.935618 | -3.289801 | -1.199806 |
| C | -3.956146 | 0.087115  | -2.017967 |
| C | -5.163482 | 0.646040  | -2.411896 |
| C | -5.985705 | 1.259624  | -1.481113 |
| C | -5.597164 | 1.315434  | -0.150365 |
| C | -4.391873 | 0.760386  | 0.247747  |
| C | -1.669509 | -1.404557 | 2.619372  |
| C | -2.064195 | -2.039033 | 3.789515  |
| C | -3.245135 | -2.762368 | 3.822802  |
| C | -4.036587 | -2.845775 | 2.685407  |
| C | -3.645131 | -2.212347 | 1.517575  |
| C | 3.988898  | -1.192255 | 1.889095  |
| C | 4.629427  | -1.246929 | 3.114844  |
| C | 4.086129  | -0.595523 | 4.214564  |
| C | 2.899463  | 0.105688  | 4.083783  |
| C | 2.255350  | 0.163493  | 2.854177  |
| C | 2.864730  | 0.093044  | -2.528101 |
| C | 3.758039  | 0.566725  | -3.474945 |
| C | 4.956548  | 1.140385  | -3.075249 |
| C | 5.255603  | 1.240795  | -1.726198 |
| C | 4.366618  | 0.762018  | -0.774002 |
| C | 2.625796  | -2.962743 | -1.216039 |
| C | 2.604980  | -4.343767 | -1.354601 |
| C | 1.844833  | -5.121175 | -0.496954 |
| C | 1.101019  | -4.511892 | 0.503277  |
| C | 1.114090  | -3.133562 | 0.638308  |
| H | 4.606244  | 0.856190  | 0.275861  |
| H | 6.184069  | 1.697326  | -1.407249 |

|   |           |           |           |
|---|-----------|-----------|-----------|
| H | 5.652361  | 1.515114  | -3.815410 |
| H | 3.513896  | 0.492596  | -4.527033 |
| H | 1.926189  | -0.343476 | -2.843397 |
| H | 4.412774  | -1.710125 | 1.038974  |
| H | 5.553844  | -1.801530 | 3.213429  |
| H | 4.588550  | -0.640000 | 5.172975  |
| H | 2.467582  | 0.611437  | 4.937963  |
| H | 1.326834  | 0.710548  | 2.758427  |
| H | 3.234749  | -2.372325 | -1.885444 |
| H | 3.192925  | -4.810691 | -2.134771 |
| H | 1.833202  | -6.198424 | -0.604284 |
| H | 0.507457  | -5.111461 | 1.181819  |
| H | 0.533533  | -2.667478 | 1.422440  |
| H | -4.275756 | -2.270220 | 0.640438  |
| H | -4.964398 | -3.403114 | 2.708458  |
| H | -3.554310 | -3.256516 | 4.735609  |
| H | -1.446752 | -1.962151 | 4.675387  |
| H | -0.751584 | -0.831530 | 2.601606  |
| H | -3.325188 | -0.390861 | -2.753633 |
| H | -5.458883 | 0.599502  | -3.452401 |
| H | -6.926827 | 1.696078  | -1.791000 |
| H | -6.231888 | 1.797028  | 0.582643  |
| H | -4.092333 | 0.814367  | 1.285596  |
| H | -2.387035 | -3.606685 | -0.270493 |
| H | -1.956991 | -5.262915 | -2.028028 |
| H | -0.919111 | -4.574477 | -4.163930 |
| H | -0.308976 | -2.202670 | -4.523828 |
| H | -0.733520 | -0.538108 | -2.759523 |

**Pd(PPh<sub>3</sub>)<sub>2</sub>Ph<sub>2</sub>**

91

|    |           |           |           |
|----|-----------|-----------|-----------|
| Pd | 0.065211  | -0.857043 | 0.038035  |
| C  | 1.008372  | -2.752458 | 0.263620  |
| C  | -0.924068 | -2.739976 | -0.171627 |
| C  | 1.785343  | -3.369384 | -0.733007 |
| C  | 2.824766  | -4.235794 | -0.409773 |
| C  | 3.128664  | -4.515278 | 0.922864  |
| C  | 2.372054  | -3.912366 | 1.926247  |
| C  | 1.324788  | -3.054189 | 1.602306  |
| C  | -1.237096 | -3.046284 | -1.509666 |
| C  | -2.303706 | -3.879314 | -1.834884 |
| C  | -3.089203 | -4.447151 | -0.832797 |
| C  | -2.787254 | -4.166357 | 0.499336  |
| C  | -1.721195 | -3.332611 | 0.823360  |
| H  | -0.633738 | -2.632913 | -2.311959 |
| H  | -2.518094 | -4.090155 | -2.878974 |
| H  | -3.913053 | -5.106912 | -1.084536 |
| H  | -3.380348 | -4.607652 | 1.295573  |
| H  | -1.491059 | -3.165795 | 1.869602  |
| H  | 1.560393  | -3.190004 | -1.779152 |
| H  | 3.399868  | -4.699300 | -1.206633 |
| H  | 3.933310  | -5.198605 | 1.173665  |
| H  | 2.591052  | -4.117853 | 2.970521  |
| H  | 0.739319  | -2.619963 | 2.406727  |
| P  | -1.911418 | 0.502864  | 0.134112  |
| P  | 1.967407  | 0.571893  | -0.128553 |
| C  | 1.750422  | 2.060764  | -1.312066 |
| C  | 3.584392  | -0.215685 | -0.799821 |
| C  | 2.624975  | 1.348042  | 1.485460  |
| C  | -2.844930 | 0.477846  | 1.802751  |
| C  | -3.198532 | -0.130475 | -1.121269 |
| C  | -1.951824 | 2.405362  | -0.159084 |
| C  | 1.084243  | 1.829055  | -2.511292 |
| C  | 0.892872  | 2.860808  | -3.416820 |
| C  | 1.357145  | 4.135132  | -3.126692 |
| C  | 2.014261  | 4.371174  | -1.929614 |
| C  | 2.213085  | 3.338531  | -1.024816 |
| C  | 4.016288  | -0.008957 | -2.102759 |
| C  | 5.177454  | -0.618604 | -2.555224 |
| C  | 5.911226  | -1.436588 | -1.711589 |
| C  | 5.477680  | -1.648280 | -0.410984 |
| C  | 4.315794  | -1.045393 | 0.043371  |
| C  | 1.817338  | 1.332541  | 2.614688  |
| C  | 2.270703  | 1.876225  | 3.808848  |
| C  | 3.536370  | 2.434735  | 3.881267  |
| C  | 4.351028  | 2.445911  | 2.757727  |
| C  | 3.899656  | 1.904209  | 1.565339  |
| C  | -4.016260 | 1.211231  | 1.979588  |
| C  | -4.664747 | 1.203944  | 3.202840  |
| C  | -4.147982 | 0.468420  | 4.261082  |
| C  | -2.980073 | -0.255955 | 4.091394  |



|   |           |           |           |
|---|-----------|-----------|-----------|
| C | -2.328582 | -0.249834 | 2.864700  |
| C | -2.902544 | -0.013443 | -2.476949 |
| C | -3.789544 | -0.490968 | -3.427650 |
| C | -4.970993 | -1.102107 | -3.032457 |
| C | -5.258856 | -1.234859 | -1.684019 |
| C | -4.375740 | -0.752183 | -0.728165 |
| C | -2.822921 | 3.017302  | -1.050925 |
| C | -2.820278 | 4.397595  | -1.193644 |
| C | -1.956051 | 5.176234  | -0.441586 |
| C | -1.089978 | 4.568909  | 0.455767  |
| C | -1.085215 | 3.190335  | 0.593389  |
| H | -4.609674 | -0.866628 | 0.321064  |
| H | -6.175047 | -1.717903 | -1.368662 |
| H | -5.662528 | -1.478627 | -3.775569 |
| H | -3.555082 | -0.388681 | -4.479591 |
| H | -1.979822 | 0.458417  | -2.789005 |
| H | -4.422250 | 1.791978  | 1.161953  |
| H | -5.575265 | 1.775134  | 3.331643  |
| H | -4.656221 | 0.464472  | 5.217357  |
| H | -2.569299 | -0.828143 | 4.913448  |
| H | -1.412946 | -0.812910 | 2.736919  |
| H | -3.510028 | 2.424607  | -1.638066 |
| H | -3.502405 | 4.863733  | -1.893429 |
| H | -1.957628 | 6.253187  | -0.552294 |
| H | -0.413513 | 5.169770  | 1.050326  |
| H | -0.406607 | 2.723740  | 1.294621  |
| H | 4.546025  | 1.909097  | 0.697821  |
| H | 5.342905  | 2.876500  | 2.810081  |
| H | 3.891742  | 2.857411  | 4.812838  |
| H | 1.632230  | 1.858420  | 4.682886  |
| H | 0.831116  | 0.888903  | 2.564484  |
| H | 3.455732  | 0.631071  | -2.769416 |
| H | 5.508419  | -0.449343 | -3.572056 |
| H | 6.817822  | -1.910175 | -2.066268 |
| H | 6.042794  | -2.289343 | 0.253692  |
| H | 3.980167  | -1.220707 | 1.057024  |
| H | 2.725428  | 3.538694  | -0.094458 |
| H | 2.376716  | 5.364223  | -1.695787 |
| H | 1.204792  | 4.942785  | -3.831524 |
| H | 0.378453  | 2.668123  | -4.349740 |
| H | 0.718667  | 0.835058  | -2.738706 |

**Pd(PPh<sub>3</sub>)<sub>2</sub>**

69

|    |           |           |           |
|----|-----------|-----------|-----------|
| Pd | 0.000088  | -0.000547 | -0.001181 |
| P  | -2.294863 | 0.000372  | -0.000868 |
| P  | 2.295048  | -0.000025 | -0.001307 |
| C  | 3.127984  | 1.696031  | -0.259134 |
| C  | 3.128978  | -1.072079 | -1.339878 |
| C  | 3.126536  | -0.623880 | 1.597844  |
| C  | -3.125959 | -0.438480 | 1.658413  |
| C  | -3.129316 | -1.216882 | -1.208909 |
| C  | -3.128101 | 1.655991  | -0.449933 |
| C  | 2.544360  | 2.576058  | -1.163946 |
| C  | 3.113072  | 3.819955  | -1.392159 |
| C  | 4.262159  | 4.194918  | -0.712017 |
| C  | 4.842715  | 3.321606  | 0.194516  |
| C  | 4.280055  | 2.074154  | 0.419941  |
| C  | 4.281232  | -0.673312 | -2.006679 |
| C  | 4.844426  | -1.492848 | -2.973501 |
| C  | 4.264218  | -2.714889 | -3.275928 |
| C  | 3.114944  | -3.116185 | -2.611278 |
| C  | 2.545694  | -2.296017 | -1.648969 |
| C  | 2.544586  | -0.274780 | 2.811682  |
| C  | 3.111973  | -0.698164 | 4.003932  |
| C  | 4.257997  | -1.479317 | 3.990300  |
| C  | 4.836784  | -1.833170 | 2.781519  |
| C  | 4.275459  | -1.405562 | 1.587466  |
| C  | -4.274078 | 0.199804  | 2.111818  |
| C  | -4.835009 | -0.158771 | 3.328572  |
| C  | -4.256650 | -1.158032 | 4.095594  |
| C  | -3.111419 | -1.797813 | 3.645164  |
| C  | -2.544431 | -1.436878 | 2.432371  |
| C  | -2.547053 | -1.393692 | -2.459291 |
| C  | -3.116893 | -2.263318 | -3.376800 |
| C  | -4.265710 | -2.967207 | -3.047598 |
| C  | -4.844884 | -2.796836 | -1.799785 |
| C  | -4.281107 | -1.922679 | -0.882423 |
| C  | -4.281642 | 1.727391  | -1.221683 |
| C  | -4.844396 | 2.959577  | -1.519296 |
| C  | -4.262457 | 4.124827  | -1.044902 |
| C  | -3.111899 | 4.056747  | -0.273420 |
| C  | -2.543106 | 2.826685  | 0.020189  |
| H  | -4.741455 | -1.795314 | 0.087898  |
| H  | -5.741081 | -3.344556 | -1.537373 |
| H  | -4.708261 | -3.649604 | -3.762407 |
| H  | -2.659412 | -2.392717 | -4.349386 |
| H  | -1.646379 | -0.847894 | -2.713736 |
| H  | -4.733890 | 0.979425  | 1.519862  |
| H  | -5.728378 | 0.344494  | 3.675910  |
| H  | -4.696957 | -1.436793 | 5.044744  |
| H  | -2.654573 | -2.578436 | 4.240040  |
| H  | -1.646564 | -1.932284 | 2.082718  |
| H  | -4.744199 | 0.823875  | -1.594977 |

|   |           |           |           |
|---|-----------|-----------|-----------|
| H | -5.741981 | 3.007140  | -2.122705 |
| H | -4.704227 | 5.085572  | -1.277878 |
| H | -2.652258 | 4.963263  | 0.099292  |
| H | -1.641095 | 2.773172  | 0.617992  |
| H | 4.735609  | -1.685394 | 0.649588  |
| H | 5.730797  | -2.443498 | 2.765165  |
| H | 4.698624  | -1.813636 | 4.921183  |
| H | 2.654828  | -0.419166 | 4.944749  |
| H | 1.646144  | 0.330654  | 2.821522  |
| H | 4.742419  | 0.277496  | -1.776620 |
| H | 5.740983  | -1.174375 | -3.490012 |
| H | 4.706314  | -3.353327 | -4.030525 |
| H | 2.656645  | -4.069044 | -2.843609 |
| H | 1.644654  | -2.606354 | -1.133533 |
| H | 4.741491  | 1.399196  | 1.127871  |
| H | 5.739140  | 3.609696  | 0.728791  |
| H | 4.703854  | 5.167942  | -0.886945 |
| H | 2.654515  | 4.497889  | -2.100742 |
| H | 1.643483  | 2.284811  | -1.690679 |

## PhPh

22

|   |           |           |           |
|---|-----------|-----------|-----------|
| C | 0.000011  | -0.742617 | -0.000063 |
| C | -0.000011 | 0.742617  | -0.000063 |
| C | -1.125644 | 1.464019  | 0.424205  |
| C | 1.125644  | -1.464019 | 0.424205  |
| C | -1.125982 | 2.855815  | 0.424622  |
| C | 1.125982  | -2.855815 | 0.424622  |
| C | 0.000000  | 3.558282  | 0.000027  |
| C | 0.000000  | -3.558282 | 0.000027  |
| C | 1.125658  | 1.464042  | -0.424226 |
| C | -1.125658 | -1.464042 | -0.424226 |
| C | 1.125995  | 2.855829  | -0.424585 |
| C | -1.125995 | -2.855829 | -0.424585 |
| H | -1.998647 | 0.928037  | 0.782343  |
| H | 1.998647  | -0.928037 | 0.782343  |
| H | -2.005604 | 3.392816  | 0.765679  |
| H | 2.005604  | -3.392816 | 0.765679  |
| H | 0.000005  | 4.643542  | 0.000059  |
| H | -0.000005 | -4.643542 | 0.000059  |
| H | 1.998663  | 0.928063  | -0.782364 |
| H | -1.998663 | -0.928063 | -0.782364 |
| H | 2.005616  | 3.392859  | -0.765598 |
| H | -2.005616 | -3.392859 | -0.765598 |
